# Supplementary material
Source: PubMed Central journal article supplement (PMC4700822)

A

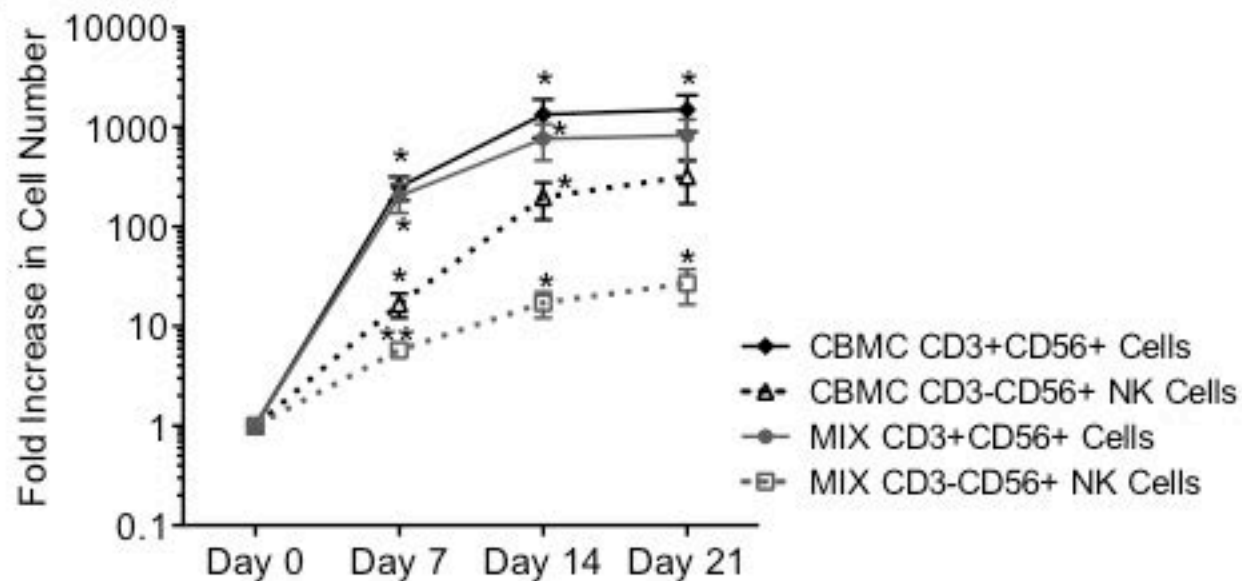

B

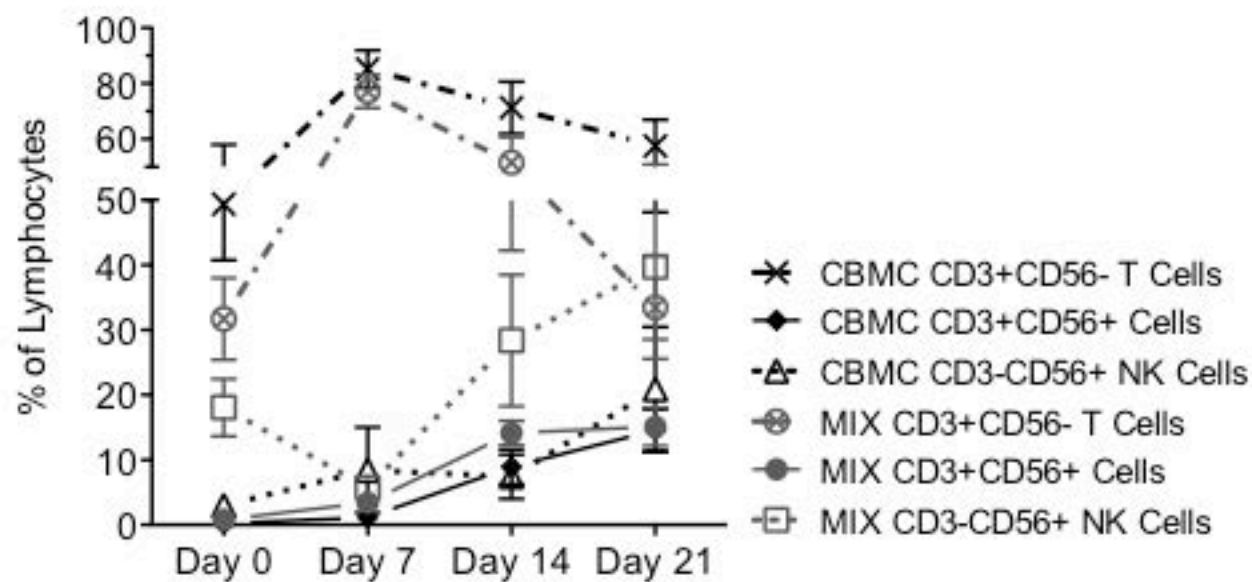

10:1 (Effector:Target)

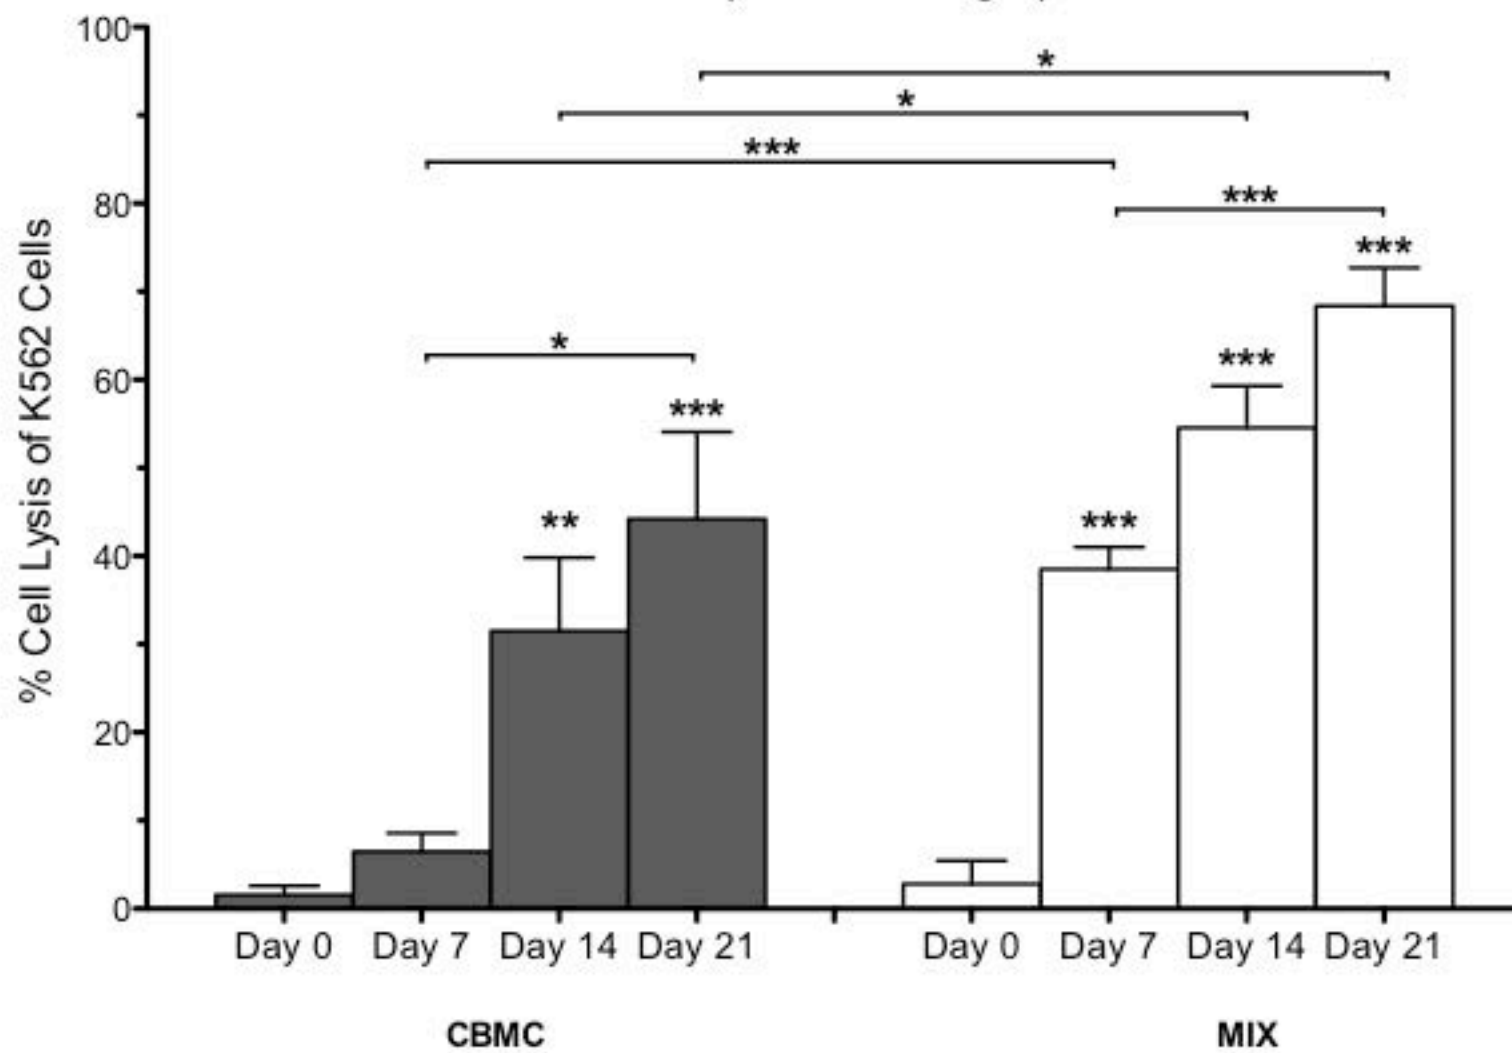

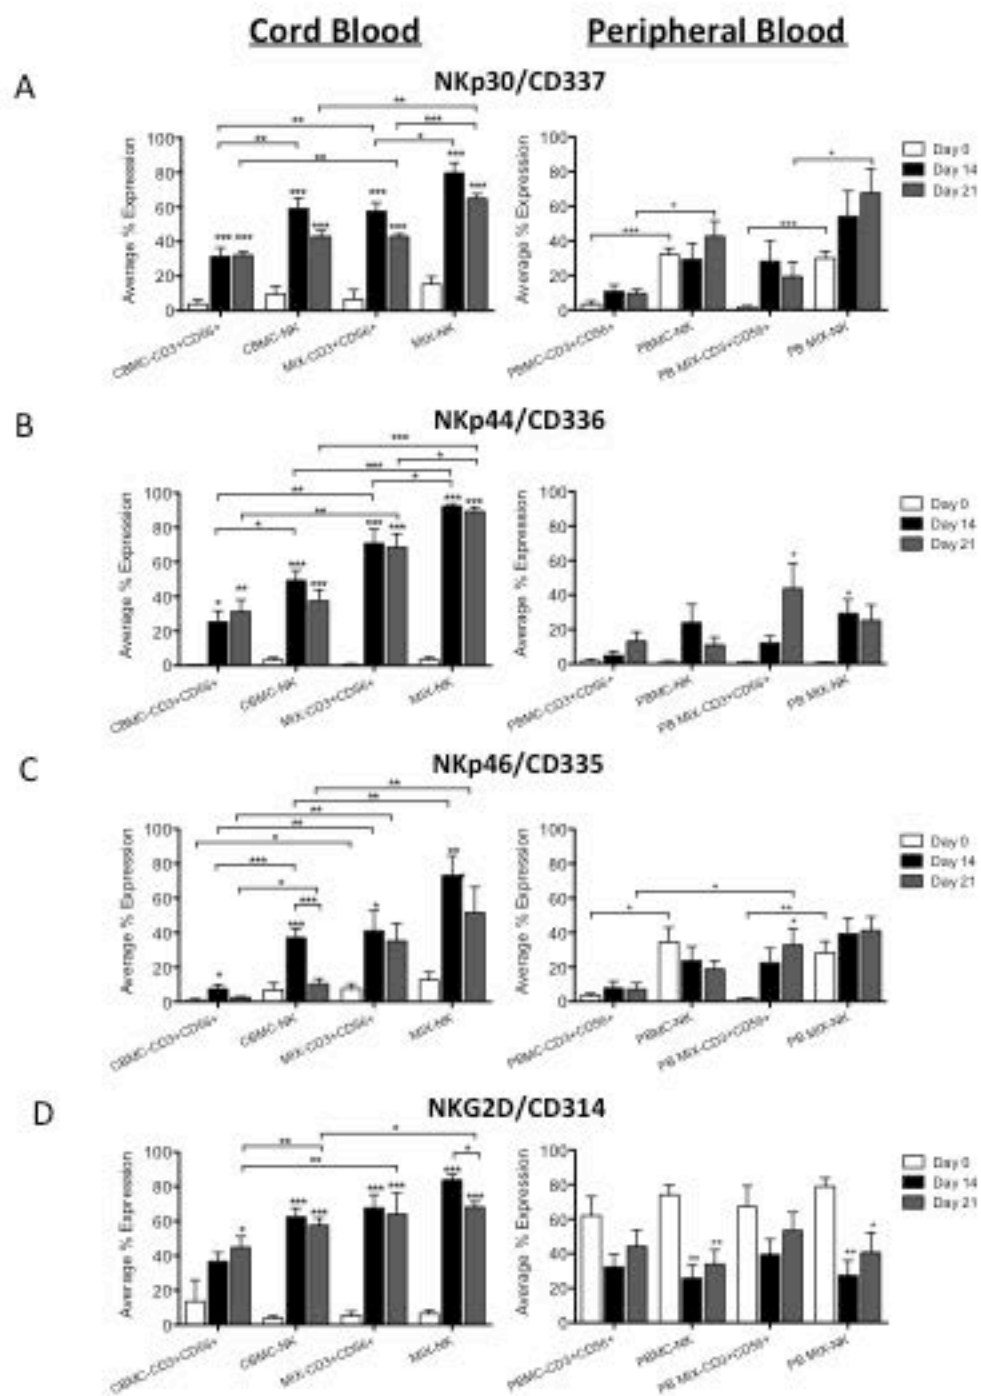

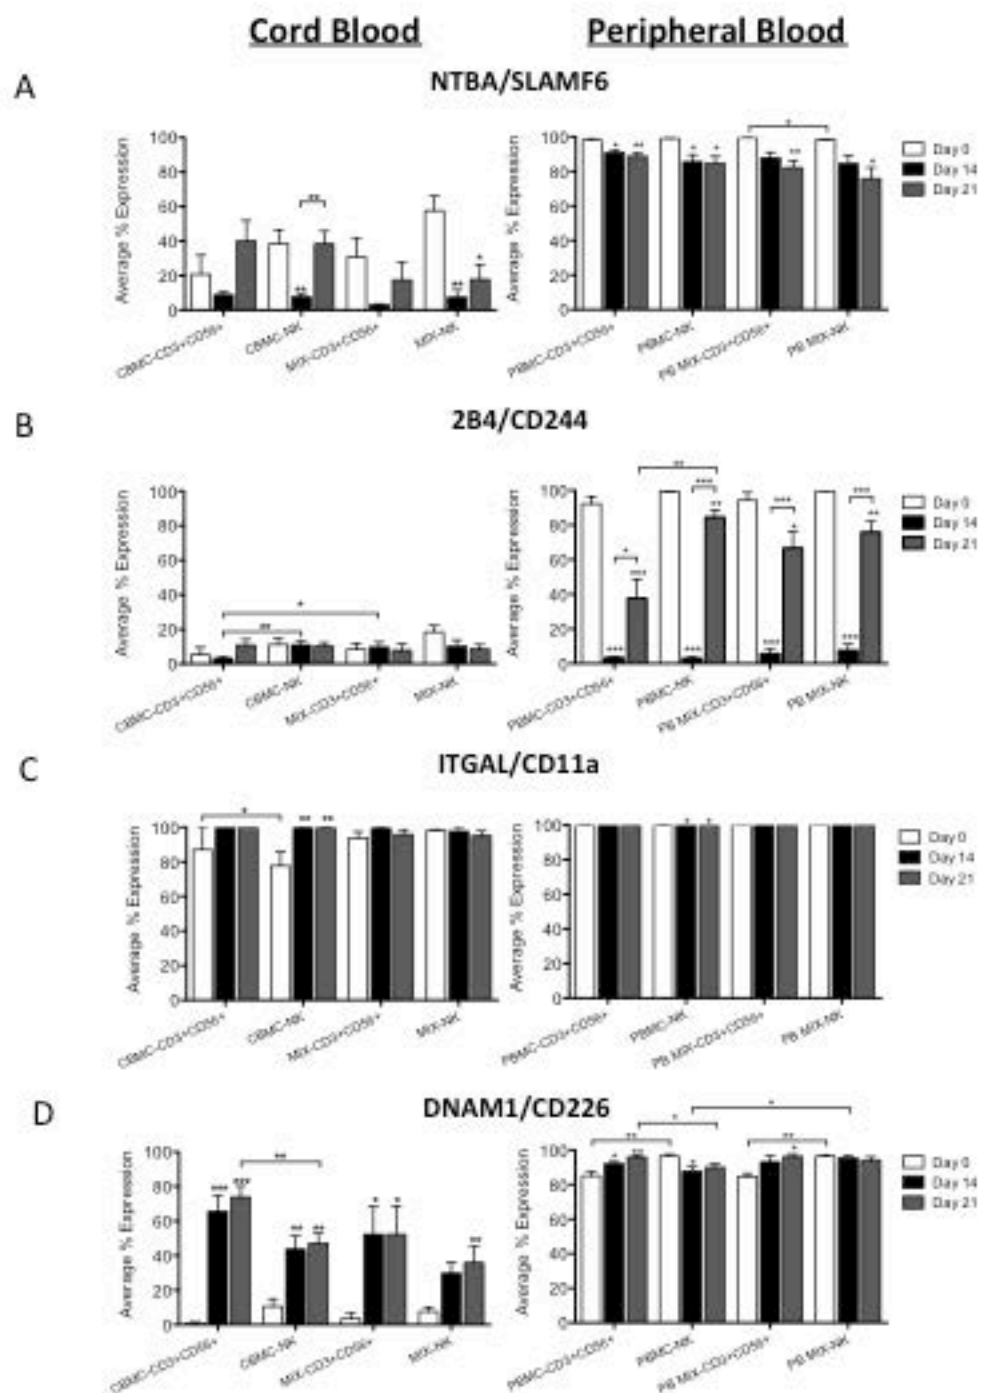

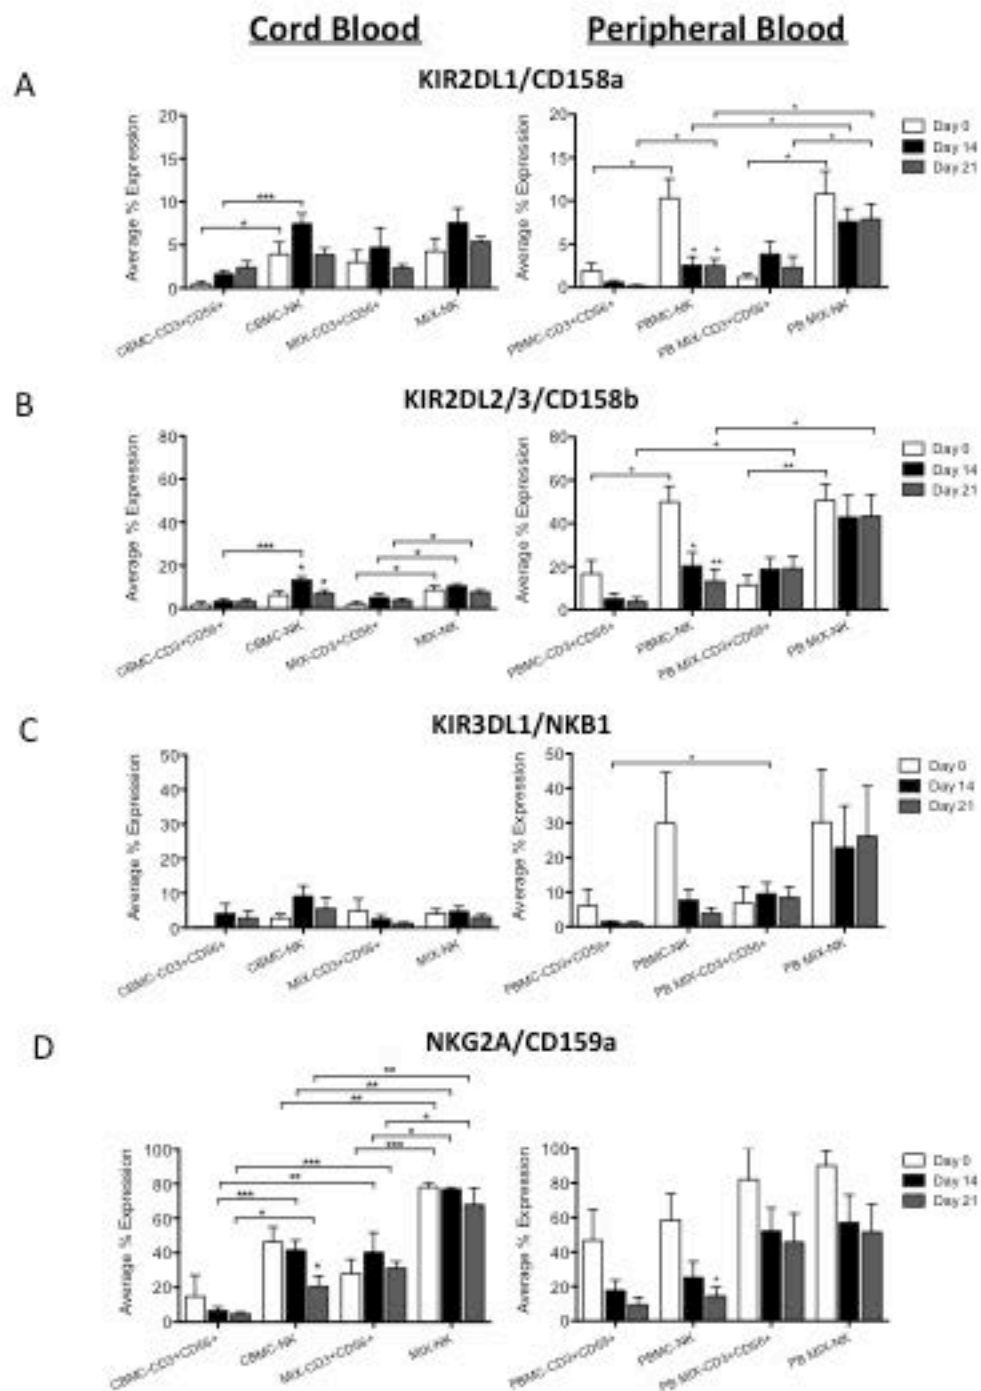

## Cord Blood

## Peripheral Blood

A

FasR/CD95

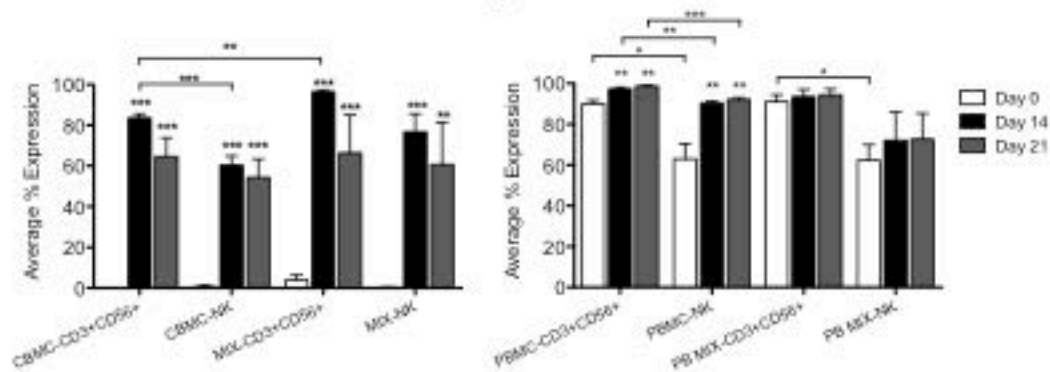

B

FasL/CD178

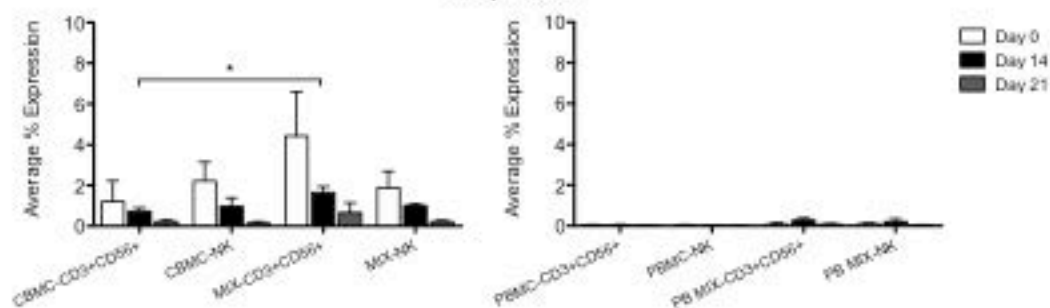

C

TRAIL/CD253

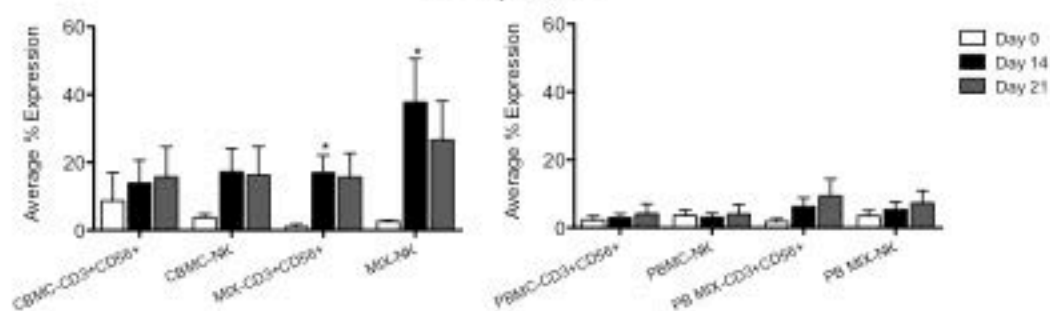

**A**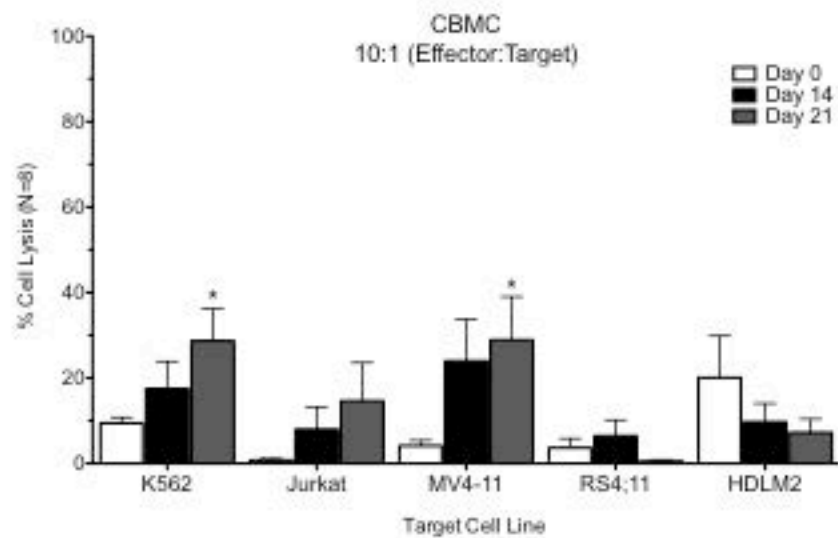**B**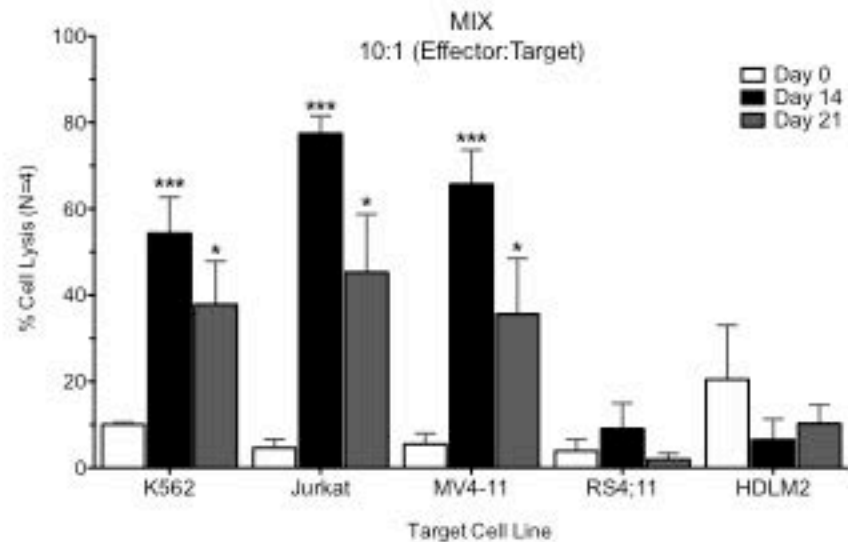**C**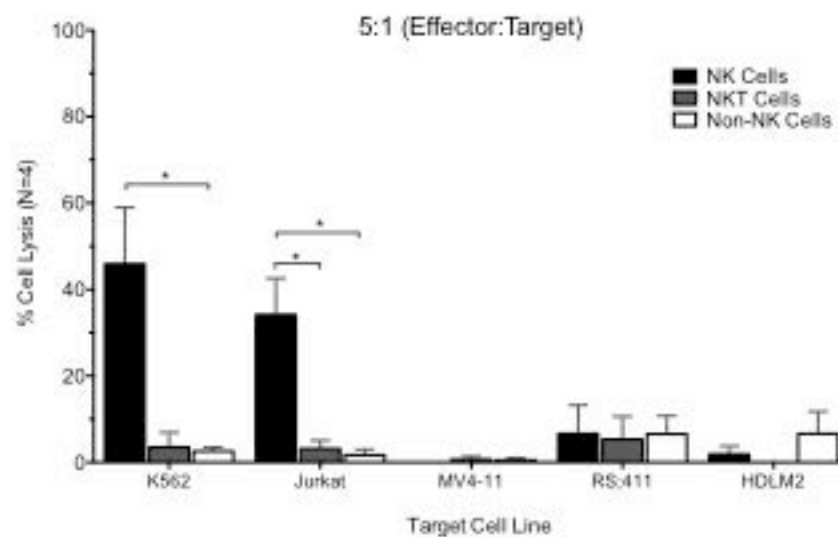

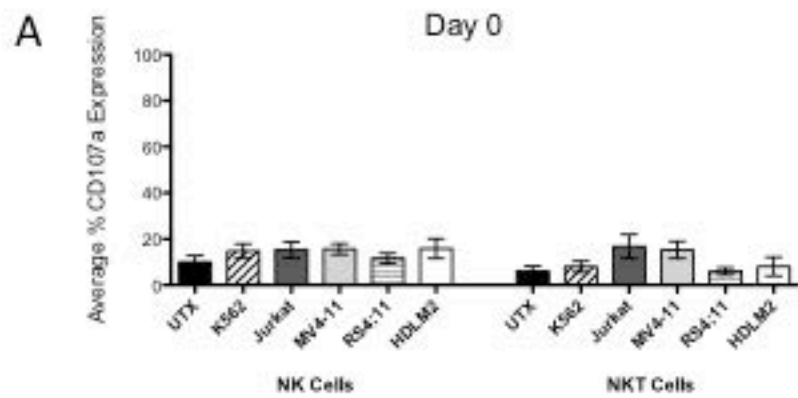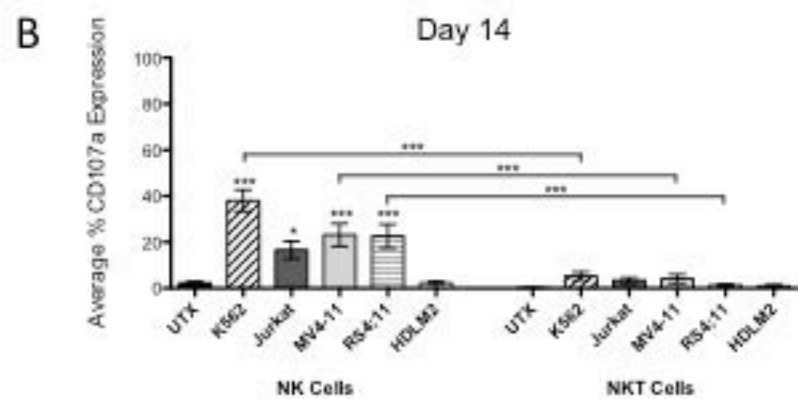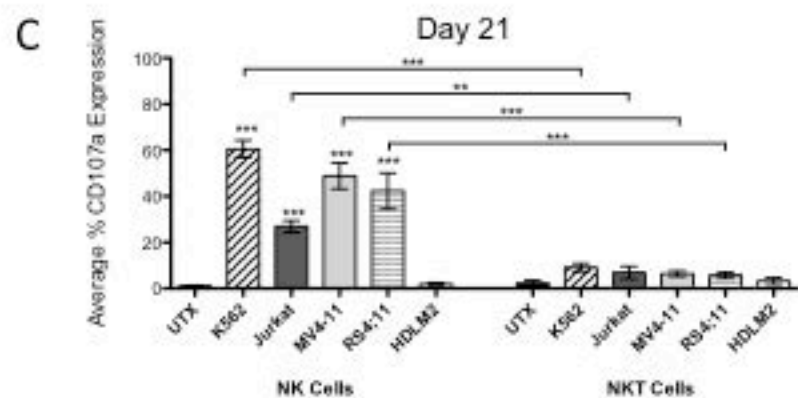



### BADTA Cytotoxicity Assay

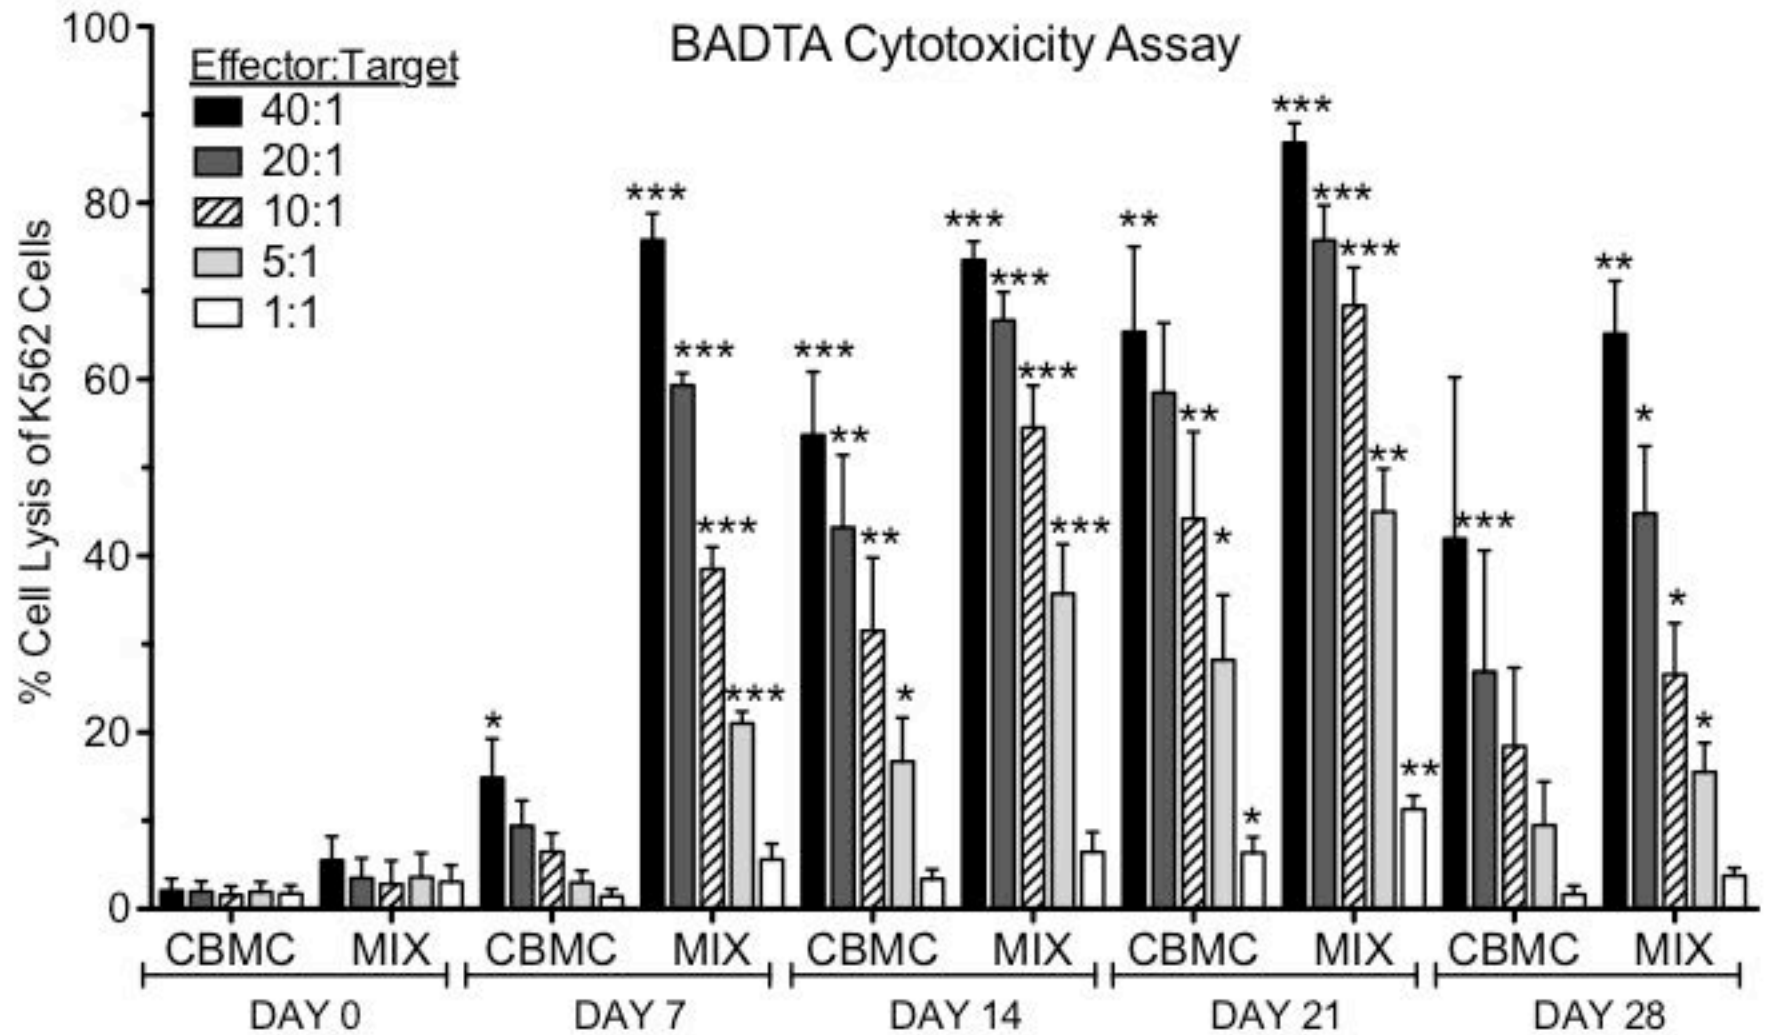

Supplement: NIHMS651661-supplement.pdf [file NIHMS651661-supplement.pdf]
